# Supplementary material
Source: publisher site journal article supplement (https://www.degruyterbrill.com/publication/journal_key/PWP/downloadAsset/PWP_PWP_Vorlage%20f%C3%BCr%20ethische%20und%20rechtliche%20Erkl%C3%A4rungen.docx)
Supplement: Supplementary file 2 [file PWP_PWP_Vorlage%20f%C3%BCr%20ethische%20und%20rechtliche%20Erkl%C3%A4rungen.docx]

Bitte geben Sie die geforderten Informationen in dem Format und der Reihenfolge an, die in der Vorlage angegeben sind. Beachten Sie die nachstehenden Anweisungen für Autoren/innen.

[VORLAGE]

| ***ERKLÄRUNG*** | ***TEXT*** |
| --- | --- |
| **Danksagungen*** |  |
| **Forschungsethik** |  |
| **Beiträge zur Veröffentlichung** |  |
| **Interessenkonflikte** |  |
| **Forschungsfinanzierung** |  |
| **Datenverfügbarkeit** |  |
|  |  |
|  |  |

*Wir akzeptieren keine Einreichungen, die künstliche Intelligenz (KI) und/oder maschinelle Lern­werkzeuge als Autor(en) in einem Manuskript nennen, da solche Werkzeuge keine Verantwortung für die eingereichte Arbeit übernehmen können und daher nicht als berechtigte Autoren in Frage kommen. Wenn solche Tools oder Technologien als Teil des Designs oder der Methodik einer Forschungsstudie verwendet werden, sollte ihre Verwendung in den Danksagungen klar beschrieben werden.

[Autorenhinweise]

[**VERPFLICHTENDE ERKLÄRUNGEN**]

**Danksagungen** Falls nicht zutreffend, bitte aus der Vorlage entfernen.

**Forschungsethik** Geben Sie die entsprechenden Informationen an.

Falls nicht erforderlich, bitte einfügen:

- „Das örtliche institutionelle Prüfstelle hat die Studie von der Prüfung ausgenommen“, wenn die Prüfstelle die Studie ausdrücklich von der Prüfung ausgenommen hat ODER
- „Trifft nicht zu.”

**Vergewissern Sie sich, dass die Angaben zur Forschungsethik mit den Angaben im Manuskript übereinstimmen.**

**Beiträge zur** Fügen Sie den Standardvermerk ein und geben Sie ggf.

**Veröffentlichung** detailliertere Informationen über den Beitrag eines/r einzelnen Autors/in an.

- „Der/Die Autor/in hat die Verantwortung für den gesamten Inhalt dieses Manuskripts übernommen und dessen Einreichung genehmigt.“

**Interessenkonflikte** Geben Sie an, ob einer der Autoren/innen einen Interessenkonflikt hat, einschließlich des Namens des Autors/der Autorin, der Autoren/innen und des Grundes, gefolgt von „Alle anderen Autoren/innen geben an, keinen Interessenkonflikt zu haben“ (falls zutreffend).

Beispiele für Interessenskonflikte sind: Berater oder beratende Funktionen, Rolle von Sponsoren, Honorare, Patente, Software-Verfügbarkeiten, Registrierungen der Studie etc.

Wenn keiner der Autoren/innen einen Interessenkonflikt hat, fügen Sie bitte Folgendes ein:

- „Der/Die Autor/en/in/innen gibt/geben an, dass kein Interessenkonflikt besteht“.

**Forschungsfinanzierung** Geben Sie an, ob Ihre Studie finanziell unterstützt wurde(bitte Förderer und Nummer des Zuschusses angeben).

Falls nicht erforderlich, bitte einfügen

- „Keine angegeben“.

**Datenverfügbarkeit** Falls zutreffend, bitte einfügen

- „Die Rohdaten können auf Anfrage beim entsprechenden Autor/bei der entsprechenden Autorin angefordert werden.“

Wenn die Art der Studie keine Rohdaten enthält, fügen Sie bitte Folgendes ein:

- „Trifft nicht zu.”
